# Supplementary material
Source: PubMed Central journal article supplement (PMC4309699)
Supplement: AEM.03292-14_zam999116031so1.pdf [file AEM.03292-14_zam999116031so1.pdf]

**An XoxF-type Methanol Dehydrogenase from the anaerobic Methanotroph ‘*Candidatus*  
*Methyloirabilis oxyfera*’**

Ming L. Wu<sup>a\*</sup>, Hans J.C.T. Wessels<sup>b</sup>, Arjan Pol<sup>a</sup>, Huub J.M. Op den Camp<sup>a</sup>, Mike S.M.  
Jetten<sup>a</sup>, Laura van Niftrik<sup>a</sup> and Jan T. Keltjens<sup>a#</sup>

Department of Microbiology, Radboud University Nijmegen, Institute for Water and Wetland  
Research, Heyendaalseweg 135, 6525 AJ Nijmegen, The Netherlands<sup>a</sup>; Nijmegen Centre for  
Mitochondrial Disorders, Centre for Proteomics, Glycomics and Metabolomics, Laboratory of  
Genetic, Endocrine and Metabolic Disease, Department of Laboratory Medicine, Radboud  
University Medical Centre, Geert Grooteplein 10, 6525 GA Nijmegen, The Netherlands<sup>b</sup>

Running Head: XoxF methanol dehydrogenase from *Methyloirabilis oxyfera*

#Address correspondence to Jan T. Keltjens, J.Keltjens@science.ru.nl

\*Present address: Ming L. Wu, Centre for Proteomics, Glycomics and Metabolomics,  
Laboratory of Genetic, Endocrine and Metabolic Disease, Department of Laboratory  
Medicine, Radboud University Medical Centre, Geert Grooteplein 10, 6525 GA Nijmegen,  
The Netherlands

A

M.extorquens\_MxaF -----NDKLVELSKSDNNVMPGKNYDSNFSIDL 29  
M.trichosporium\_MxaF -----EDKLEALTKSEDNVMWQKKNYSANHYSL 29  
H.denitrificans\_MxaF -----NDKLIELSNENMVMPPGKNYDSNHYSTS 29  
P.denitrificans\_MxaF -----NDQLVELAKDPANVWMTGRDYNAQVNSFM 29  
M.oxyfera\_MxaF -MRLHMRGARGMLLVGGMLLHMTSSVASANEELIRLAKDERNVMWQKTYDVTQRFPSKL 59  
M.extorquens\_XoxF5 -----MRAVHLHLGAGLAASAPALANEVSLKGVANPAEQVLQTVDYANTRYSL 50  
M.radiotol\_XoxF5 -----MRAVHLHLGAGVAAPVAPALANEVSMVKGIANPAEQVLQTVDYANTRYSL 51  
B.MAFF\_XoxF5 -----MRKLLYATGLGMAVFAVGAANENDELHKMAQNPMDVMWPTGQDYANTRYSL 52  
M.oxyfera\_XoxF2 -----MSVKKRMSLIGLLVLGASLAISAPIVSAANDVLLKQKDDGQVWVQSKNYSGTRYSL 58  
M.fumariol\_XoxF2 -----NDEILKLEKEPQGWQMNKNYANTRYSL 29  
M.oxyfera\_XoxF1 --MGKPLSGSTMAGMIAGALMLAASGSALANEELIVRASKNPDLWPAQGRDLAMTRHSL 58  
M.sylvestris\_XoxF1 --MNLRLKSLPWRAPAGLAMASLSGAAWAGSDEEIIKNSKNPDLWPGMQNLGLQRHSL 58

M.extorquens\_MxaF KQINKGNVQLRPAWTFSTGLLNGHGGAPLVVDG---KMYIHTSFP-----NNTFAL 78  
M.trichosporium\_MxaF TQINTDNVKNLWVWSFSSTGLLSGHEGSPIVVDG---KMYIHTSFP-----NNTFAL 78  
H.denitrificans\_MxaF TQINVDNVKQLKHAWFSSTGLLHGHGGAPLVVDG---VMYVHSSFP-----NKTFFAL 78  
P.denitrificans\_MxaF TDINKENNVKQLRPAWFSSTGLVLRHGGTPLVVDG---RMFIHTFP-----NNTFAL 78  
M.oxyfera\_MxaF DQIDTSNVKNLQPAWFSSTGLVLRHGGTPLVVDG---IMYVHSAFP-----NNTVYAI 108  
M.extorquens\_XoxF5 DQINASNVLNQLVAVTFSTGLVLRHGGSPPLVGN---IMYVHTFP-----NIVYAL 99  
M.radiotol\_XoxF5 DQINAKNVKDLQVAVTFSTGLVLRHGGSPPLVGN---VMYVHTFP-----NIVYAL 100  
B.MAFF\_XoxF5 NQINASNVMKQVAVTFSTGLVLRHGGPLIIGN---MMYVHTFP-----NKVYAI 101  
M.oxyfera\_XoxF2 NQITPENAKNLKVAWFSSTGLTLNGHGGPLVVDG---TMYAHSSVAGGPTGHSNIFAL 114  
M.fumariol\_XoxF2 NQINTKNVSRLLVAWFSSTGLALRGGGGPLVVDG---TMYVHSAFP-----NHVYAL 78  
M.oxyfera\_XoxF1 KDINTANVKLLMMSWSSTGLALRGGGGPVIIVVAVGTFMMFFVSPWP-----NIVQAL 111  
M.sylvestris\_XoxF1 KDINKDNVSNLQMSWSSTGLALRGGGGPVIIVVAVGTFMMFFVSAWP-----NIVQAL 111

M.extorquens\_MxaF GLD--DPGTLILWQDKPKQNPAA--ARAVACCDIVNRCCLAYWPDGGKTPALILKTLQDGNVA 134  
M.trichosporium\_MxaF NLD--DPTRIWLQDKPKQNA--ARAVACCDIVNRCCLAYWPTDGTTPSLIKTLQDGNVA 134  
H.denitrificans\_MxaF LND--DPGHLLWQHSKQDPA--ARAVACCDIVNRCCLAYWPGDGTTPSLIKTLQDGHVLA 134  
P.denitrificans\_MxaF DLN--EPGKILWQNKPKQNP--ARTVACCDIVNRCCLAYWPGDGVKPLIFRTQDGHVLA 134  
M.oxyfera\_MxaF DLE--HPEKIMWYRFPKQNPAA--ARAVACCDIVNRCCLAYLADGK-----LILSLOTQLL 158  
M.extorquens\_XoxF5 DLD--GQAKILWYKYPKQDPS--VIVPVMCCDIVNRCCLAYADGA-----ILLHQADITL 149  
M.radiotol\_XoxF5 DLD--HEAKILWYKYPKQDPS--VIVPVMCCDIVNRCCLAYADGA-----ILLHQADITL 150  
B.MAFF\_XoxF5 DLS--KNDQILWYKYPKQDPN--VIVPVMCCDIVNRCCLAYADGK-----ILFHQADITL 151  
M.oxyfera\_XoxF2 DLSK--EGAPIKWRYNAKYDQK--APPVACCDIVNRCCLAYANGK-----ILYQTLDSMVI 165  
M.fumariol\_XoxF2 DLSDQ--KPYAIKWQYTPVQNSQ--AVAVACCDIVNRCCLAYANGK-----IPMTLTDQIIL 129  
M.oxyfera\_XoxF1 DLSDEHPKQVWNYKKTDRDELAVTRAACCDIVNRCCLAYADGK-----VVFHTLTDGYVI 165  
M.sylvestris\_XoxF1 DLSDEDPNPQVMSYKKTDRDVSAPVRAACCDIVNRCCLAYADGK-----LLENTLDBFLI 165

M.extorquens\_MxaF ALNAEETGETVWVKVENSIDKVGSTLTIAPVVKIKVVIIGSGAGLGVRYGYLTAYDVRTCEQ 194  
M.trichosporium\_MxaF ALNAEETGAIWVKIENSIDYKVGSTLTIAPVHYKNIIVLIGSGAGLGVRYGYMTAYDVRTCEQ 194  
H.denitrificans\_MxaF ALNAEETGEEFWKVENGDIKVGSTLTIAPVYVHILAVIGSGAGLGVRYGYVTAAYDVRTCEQ 194  
P.denitrificans\_MxaF AMDAETGETRWIENSIDKVGSTLTIAPVVIKILVIGSGAGLGVRYGYVTAAYDVRTSEM 194  
M.oxyfera\_MxaF AMDAKTGVVWVETADVVSQGTQIQAPFVVKIKVVIIGSAGAGLGVRYGYVTAAYDVRTDGGK 218  
M.extorquens\_XoxF5 SLDAKSGKVNWSVNGDPSKGETNTATLPLVKIKVVIIGSGGDFGQVCHVTAYDLRSGSK 210  
M.radiotol\_XoxF5 SLDAKTGVNWSVNGDPSKGETNTATLPLVKIKVVIIGSGGDFGQVCHVTAYDLRSGTK 209  
B.MAFF\_XoxF5 ALDAKTGVKVTNKGNDPSKGSTGTAAMVVIKIKVVIIGSGGDFGQVCHVTAYDLRSGTK 211  
M.oxyfera\_XoxF2 ALDAKTGKELWKTNRADPSKGETSTAAGLVIKIKVVIIGSAGDFGVRGVAAYDINTCKQ 225  
M.fumariol\_XoxF2 ALDANTGKELWKMHADVTKGETTIGAPLVIKIKVVIIGSGGDFGVRGVAAYDINTGNR 189  
M.oxyfera\_XoxF1 ALDAKTGKEIWTVKHAWSDKGETTIGHTLIIANVKVVIIGSGDFGVAARGRTVAYDLRSGTK 225  
M.sylvestris\_XoxF1 ALDAKTGQELWVVKHAFPEHGETVTSAPLIAKIKVVIIGSGDFGVAARGRLAYDLRSGTDL 225

M.extorquens\_MxaF VWRAYATGPDKDLLASDFNINKNPHYQKGL--GTGTWEGDAWKIIGGNWGWYAYDPDT 252  
M.trichosporium\_MxaF KWRAYATGPDSDVLIGDDFNANKNPHYQKGL--GTATWEGDAWKIIGGNWGWYAYDPDT 252  
H.denitrificans\_MxaF AVRKYATGPDABEGLADDNSANPHYQKGL--GTATWEGDAWKIIGGNWGWYAYDPA 252  
P.denitrificans\_MxaF RWRAYATGPDDELLAEDFNANPHYQKGL--GLTWTWEGDAWKIIGGNWGWYAYDPDV 252  
M.oxyfera\_MxaF VWRAYATGPDKDLLDKDFNKQNPYGRFGL--GLKTWEGDAWKIIGGNWGWYAYDPA 276  
M.extorquens\_XoxF5 VWRGYSIGPDDQLIVDPEKTTSLGKPIIGKDS--SLKTWEGDQWKTGGGCTWGWYAYDPKL 267  
M.radiotol\_XoxF5 VWRGYSIGPDDQLIVDPEKTTSLGKPIIGKDS--SLKTWEGDQWKTGGGCTWGWYAYDPKL 268  
B.MAFF\_XoxF5 VWRGYSIGRMTRSWSTTRPSSASR-SARTP--SLKTWEGDQWKTGGGATWGWYAYDPKL 268  
M.oxyfera\_XoxF2 VVKARS-MGPDDEIKLAPDFNANPHYGRFGE--GTKSWPGEWKKGGCTWGWYAYDPKL 283  
M.fumariol\_XoxF2 VWLAYSQGPDEEVLDSDFNKEFPYHGGYGD--GKTWPGEQWKLGGCTWGWYAYDPAL 247  
M.oxyfera\_XoxF1 VVNCHTSIPGDDVCLTPETNKANPHYQKGLMGIYSPNDEWKIIGGAPDEWSTYDPDL 285  
M.sylvestris\_XoxF1 AWRQCSNGTDKDVCLTPTDINKAHPHGTGYGHDIGLSSYPGDEWKRGGGSPWAWYAYDPKL 285

M.extorquens\_MxaF NLIYFGTGNPAPWNET-----MRPGDKNMTITIFGRDADTGE 289  
M.trichosporium\_MxaF NLIYVYGGSNPAPWNET-----MRPGDKNMTITIWGRDLETGE 289  
H.denitrificans\_MxaF NLIYVYGGSNPAPWNET-----MRPGDKNMTITITARDADDTGK 289  
P.denitrificans\_MxaF DLFYVYGGSNPAPWNET-----MRPGDKNMTIAMIWGREATTGE 289  
M.oxyfera\_MxaF DLIYVYGGSNPAPWNET-----MRPGDKNMTITMWRGNADDTGL 313  
M.extorquens\_XoxF5 DLMYVYGGSNPSTWPK-----QRPGDNKWSMTIWARNEADDTG 304  
M.radiotol\_XoxF5 DLMYVYGGSNPSTWPK-----QRPGDNKWSMTIWARNEADDTG 305  
B.MAFF\_XoxF5 NLIYVYGGSNPSTWPK-----QRPGDNKWSMTIWARNEADDTG 305  
M.oxyfera\_XoxF2 NLIYVYGGSNPSTWPK-----PRKGGDNKWSMTIWARNEADDTG 321  
M.fumariol\_XoxF2 DLFYVYGGSNPSTWPK-----QRKGGDNKWSMTIWARNEADDTG 385  
M.oxyfera\_XoxF1 RLIVYVYGGSNPSTWPK-----NOYDEPLRSGRWNNKMTIFARKADDTGE 245  
M.sylvestris\_XoxF1 GLVYASTGNPSTWPK-----TDAECN-----SGKWDNWSMTIWARNEADDTGE 334

M.extorquens\_MxaF AKFGYQKTPHEDNRYAGVNVMLSEQDKKDGKARKLLTHPDRNGIIVTLDRDAGALVSAN 349  
M.trichosporium\_MxaF AKFGYQKTPHEDNRYAGVNVMLSEQDKKDGKARKLLTHPDRNGIIVTLDRDAGTGLVSAD 349  
H.denitrificans\_MxaF MKFGYQKTPHEDNRYAGVNVMLSEQDKKDGKARKLLTHPDRNGIIVTLDRDAGGLISAD 349  
P.denitrificans\_MxaF AKFGYQKTPHEDNRYAGVNVMLSEQDKKDGKARKLLTHPDRNGIIVTLDRDAGGLISAD 349  
M.oxyfera\_MxaF AKYGYQKTPHEDNRYAGVNVMLTDQVFN-GKMTPLVTHPDRNGIIVTLDRDAGLSAAD 372  
M.extorquens\_XoxF5 AKWVYQKTPHEDNRYAGVNVMLTDQVFN-GKDRKLLTHPDRNGIIVTLDRDAGLVVAE 363  
M.radiotol\_XoxF5 AKWVYQKTPHEDNRYAGVNVMLTDQVFN-GKDRKLLTHPDRNGIIVTLDRDAGLVVAE 364  
B.MAFF\_XoxF5 AKWVYQKTPHEDNRYAGVNVMLTDQVFN-GKDRKLLTHPDRNGIIVTLDRDAGLVVAE 364  
M.oxyfera\_XoxF2 AKWAYQKTPHEDNRYAGVNVMLTDQVFN-GKDRKLLTHPDRNGIIVTLDRDAGLVVAE 380  
M.fumariol\_XoxF2 ARWAYQKTPHEDNRYAGVNVMLTDQVFN-GKDRKLLTHPDRNGIIVTLDRDAGLVVAE 344  
M.oxyfera\_XoxF1 AVWAYQKTPHEDNRYAGVNVMLTDQVFN-GKDRKLLTHPDRNGIIVTLDRDAGLVVAE 404  
M.sylvestris\_XoxF1 VVWAYQKTPHEDNRYAGVNVMLTDQVFN-GKDRKLLTHPDRNGIIVTLDRDAGLVVAE 404

M.extorquens\_MxaF KLDLDTNVFVKSVDLKT---GQPVREPEYGT---MDHLAKDIPSAMGYHNOGHDSYD 401  
M.trichosporium\_MxaF KLDLDTNVFVKSVDLKS---GLPVRPEYGT---MDHLAKDIPSAMGYHNOGHDSYD 401  
H.denitrificans\_MxaF KLDLDTNVFVKSVDLKT---GLPVRPEYGT---MDHLAKDIPSAMGYHNOGHDSYD 401  
P.denitrificans\_MxaF KMDDTNVWKEVQLDT---GLPVRPEYGT---MDHLAKDIPSAMGYHNOGHDSYD 401  
M.oxyfera\_MxaF KLDPSNVWTRKVDLKT---GATRDPEFSTR---MDHLAKDIPSAMGYHNOGHDSYD 424  
M.extorquens\_XoxF5 KFDPPVWATKVLDDKGSKYGRPLVSKYSTQNGEDNKSGLKPAALGTQDQPAFAS 423  
M.radiotol\_XoxF5 KFDPPVWATKVLDDKGSKYGRPLVSKYSTQNGEDNKSGLKPAALGTQDQPAFAS 424  
B.MAFF\_XoxF5 KYDPKPNWATKVLDDKGSKYGRPLVSKYSTQNGEDNKSGLKPAALGTQDQPAFAS 424  
M.oxyfera\_XoxF2 KYDPKPNWATKVLDDKGSKYGRPLVSKYSTQNGEDNKSGLKPAALGTQDQPAFAS 424  
M.oxyfera\_XoxF2 AFVY--VWAKGIDLKT---GRPILNPEKLT---QGEDTKNIPCSAMGGKQYLPVAYS 431  
M.fumariol\_XoxF2 PFVY--VWAKELSKEN---DRPVEPEKRT---QGVDTKKNIPCSAMGGKQYLPVAYS 395  
M.oxyfera\_XoxF1 KFFP--VWAKVVDLKT---GRPVKIKESHPF---ARHVTQVPSLGAKNQQLIAD 455  
M.sylvestris\_XoxF1 KFTV--VWAKVVDLKT---GRPVKIKESHPF---KIGVNTQVPSAMGGKQYLPVAYS 445

M.extorquens\_MxaF PK-RELFPMGINNHCMWDEPFFMLFYRA-GQFFVYGATLNMYPGKGRDQNYEGLGQIKAYN 459  
M.trichosporium\_MxaF PT-KEFLFGLVNHCMWDEPFFMLFYRA-GQFFVYGATLNMYPGKGRDQNYEGLGQIKAYN 459  
H.denitrificans\_MxaF PE-KQFLFGLVNHCMWDEPFFMLFYRA-GQFFVYGATLNMYPGKGRDQNYEGLGQIKAYN 459  
P.denitrificans\_MxaF PQ-RKFLFGLVNHCMWDEPFFMLFYRA-GQFFVYGATLNMYPGKGRDQNYEGLGQIKAYN 459  
M.oxyfera\_MxaF PR-SEFLFPMGINNHCMWDEPFFMLFYRA-GQFFVYGATLNMYPGKGRDQNYEGLGQIKAYN 476  
M.extorquens\_XoxF5 PK-TGLFVYVPTNHCMWDEPFFMLFYRA-GQFFVYGATLNMYPGKGRDQNYEGLGQIKAYN 477  
M.radiotol\_XoxF5 PK-TGLFVYVPTNHCMWDEPFFMLFYRA-GQFFVYGATLNMYPGKGRDQNYEGLGQIKAYN 478  
B.MAFF\_XoxF5 PL-TGLFVYVPTNHCMWDEPFFMLFYRA-GQFFVYGATLNMYPGKGRDQNYEGLGQIKAYN 477  
M.oxyfera\_XoxF2 PD-TNLFYASVNNHCMWDEPFFMLFYRA-GAPYVYGATLNMYPGKGRDQNYEGLGQIKAYN 487  
M.fumariol\_XoxF2 PQ-TGLFVYVPTNHCMWDEPFFMLFYRA-GAPYVYGATLNMYPGKGRDQNYEGLGQIKAYN 450  
M.oxyfera\_XoxF1 PKPEPHLAVATNWHCMWDEPFFMLFYRA-GQFFVYGATLNMYPGKGRDQNYEGLGQIKAYN 509  
M.sylvestris\_XoxF1 PKDPTNFYVPTNHHCMWDEPFFMLFYRA-GQFFVYGATLNMYPGKGRDQNYEGLGQIKAYN 459

M.extorquens\_MxaF AITGDKYKWEKMERFAVGGTMAATAGDLVYFGTLDGVLKARDSDTQDLLWFKPLPSGAI 519  
M.trichosporium\_MxaF AITGDKYKWEKMERFAVGGTMAATAGDLVYFGTLDGVLKARNSDTQDLLWFKPLPSGAI 519  
H.denitrificans\_MxaF AITGDKYKWEKMERFAVGGTMAATAGDLVYFGTLDGVLKARNSDTQDLLWFKPLPSGAI 519  
P.denitrificans\_MxaF AITGDKYKWEKMERFAVGGTMAATAGDLVYFGTLDGVLKARNSDTQDLLWFKPLPSGAI 519  
M.oxyfera\_MxaF AITGDKYKWEKMERFAVGGTMAATAGDLVYFGTLDGVLKARNSDTQDLLWFKPLPSGAI 519  
M.extorquens\_XoxF5 NLTGKIKWNSPEQFASVGGALATAGDVFYFGTLDGVLKARNSDTQDLLWFKPLPSGAI 537  
M.radiotol\_XoxF5 GVNKIKWNSPEQFASVGGALATAGDVFYFGTLDGVLKARNSDTQDLLWFKPLPSGAI 538  
B.MAFF\_XoxF5 NLTGKIKWNSPEQFASVGGALATAGDVFYFGTLDGVLKARNSDTQDLLWFKPLPSGAI 537  
M.oxyfera\_XoxF2 VVKGKRAWLIKESQFASVGGPVVTSINVVYFGTLDGVLKARNSDTQDLLWFKPLPSGAI 547  
M.fumariol\_XoxF2 ALKGRKRWLIEHPFASVGGPVVTSINVVYFGTLDGVLKARNSDTQDLLWFKPLPSGAI 510  
M.oxyfera\_XoxF1 VLTGKIKWNSPEQFASVGGALATAGDVFYFGTLDGVLKARNSDTQDLLWFKPLPSGAI 569  
M.sylvestris\_XoxF1 VLTGKIKWNSPEQFASVGGALATAGDVFYFGTLDGVLKARNSDTQDLLWFKPLPSGAI 559

|                        |                          |              |                                           |             |            |
|------------------------|--------------------------|--------------|-------------------------------------------|-------------|------------|
|                        |                          | <b>8B</b>    |                                           | <b>8C</b>   |            |
| M.extorquens_MxaF      | EMTYT-HKGTQYVAIYY        | EVGGW        | EVGLVPDLA--DPTAGLGAVG-AFKK-LANYTQ         | MGGG        | 574        |
| M.trichosporium_MxaF   | EVVYQ-HKGVQYVAILY        | EVGGW        | EVGLVPDLQ--DPTAGLGAVG-AFKK-LANYTQ         | MGGG        | 574        |
| H.denitrificans_MxaF   | EMTYE-HKGVQYIAVMS        | EVGGW        | EVGLVPDLQ--DPTAGLGAVG-AFKK-LQNYTQ         | MGGS        | 574        |
| P.denitrificans_MxaF   | EMTYK-HDGRQYVAIMY        | EVGGW        | EVGLVPDLA--DPTAGLGSVG-AFKK-LQEFTQ         | MGGG        | 574        |
| M.oxyfera_MxaF         | HITYE-HNGKQYVAILY        | EVGGW        | EVGLVPDLN--DPTAGLGSVG-AFKE-LAKYTH         | MGGG        | 591        |
| M.extorquens_XoxF5     | VMTYE-HKGGQHVAVLS        | EVGGW        | AGIGLAAGLT--DPNAGLGAVG-GYAA-LSSYTH        | LGGG        | 592        |
| M.radiotol_XoxF5       | VMTYQ-HKGGQYVAVLS        | EVGGW        | AGIGLAAGLT--DPNAGLGAVG-GYAA-LSQYTH        | LGGG        | 593        |
| B.MAFF_XoxF5           | VTTYE-MNGKQYVAVLS        | EVGGW        | AGIGLAAGLT--DPTAGLGAVG-GYAA-LSNYTH        | LGGT        | 592        |
| M.oxyfera_XoxF2        | HITKGPDKQYVAVYS          | EVGGW        | GATVSLDLPPDDPTAALGGVNAAYKSGLPMAH          | TKGGT       | 607        |
| M.fumariol_XoxF2       | HITFLGPDKKQYVAVYS        | EVGGW        | GIAVAQNLPPDDPYAGLGAVGVAYQAGLPKHT          | TVGGE       | 570        |
| <b>H.oxyfera_XoxF1</b> | <b>HITYK-IKGGQYVSVLA</b> | <b>EVGGW</b> | <b>GLPVTAEALDFDDKYGAIGATAMAKLTGLDKIPQ</b> | <b>-GGV</b> | <b>627</b> |
| M.sylvestris_XoxF1     | HITAYK-IKGEHYISVFA       | EVGGW        | GLPAVAGLLEDEKFGAIGSTALTKVIGLNKIPQ         | -GGA        | 617        |
|                        | ..                       | ::::         | *:*** *                                   | * * ..:*    | **         |

|                         |          |                      |     |
|-------------------------|----------|----------------------|-----|
| M.extorquens_MxaF       | VVVFSLD  | SKGPYDDPNVGEWKSAAK-- | 599 |
| M.trichosporium_MxaF    | VMVFLN   | GNNGPYDDVNLGEYKAN--- | 597 |
| H.denitrificans_MxaF    | LEVFSLD  | GKNPYDDVNVGEYKKG---  | 597 |
| P.denitrificans_MxaF    | VMVFSLD  | GESPYSDPNVGEYAPGEPT  | 600 |
| M.oxyfera_MxaF          | LMVFALP  | EGR-----             | 601 |
| M.extorquens_XoxF5      | LTVFSLP  | NN-----              | 601 |
| M.radiotol_XoxF5        | LTVFALP  | N-----               | 601 |
| B.MAFF_XoxF5            | LTVFSLP  | QQ-----              | 601 |
| M.oxyfera_XoxF2         | LYVFG    | L-----               | 613 |
| <b>M.fumariol_XoxF2</b> | LYVFALE  | -----                | 577 |
| <b>H.oxyfera_XoxF1</b>  | LYTFRID  | -----                | 634 |
| M.sylvestris_XoxF1      | LYTFRVPE | KEATAH-----          | 631 |
|                         | ..       | ..*                  | :   |

**B**

|                      |                                        |            |           |                      |           |               |     |
|----------------------|----------------------------------------|------------|-----------|----------------------|-----------|---------------|-----|
| M.extorquens_MxaI    | YDGTKCKAAGNCWEPKPGFPEKIAGSKYDP         | <b>RHD</b> | <b>PK</b> | ELNKQADS             | IKQMEERNK | KRVENFKK      | 60  |
| H.denitrificans_MxaI | YDGTHTCKAPGNCWEPKPGFPEKIAGSKYDP        | <b>RHD</b> | <b>PK</b> | ELNKQVESR            | KGEEERNAN | RAEHFKK       | 60  |
| Methylophilus_MxaI   | YDGNCKEFGNCWENKPGYPEKIAGSKYDP          | <b>RHD</b> | <b>PK</b> | VELNKQ               | EESIKAM   | DARNAKRIANAKS | 60  |
| P.denitrificans_MxaI | YDGTNCKAPGNCWEPKPDYPKAVGSKYDP          | <b>PHD</b> | <b>PK</b> | PAELSKQGESL          | AVMDARNE  | WRVWNMKK      | 60  |
| M.oxyfera_MxaI       | <b>YDGTKCKE</b> FGACWEPKPGYPARVAGSKYDP | <b>RHD</b> | <b>PK</b> | <b>EVAKQ</b> ELAHKAM | DERNEKR   | <b>WKHPQE</b> | 60  |
|                      | ***:***                                | * ** **    | *:*       | ::                   | *****     | ***           | *:* |
|                      |                                        |            |           |                      |           |               | ::  |

  

|                      |                         |    |
|----------------------|-------------------------|----|
| M.extorquens_MxaI    | TGKFEYDVAKISAN-----     | 74 |
| H.denitrificans_MxaI | TGKWYDVKKIQ-----        | 72 |
| Methylophilus_MxaI   | SGNFVFDVK-----          | 69 |
| P.denitrificans_MxaI | TGKFEYDVKKIDGYDETKAPPAE | 83 |
| M.oxyfera_MxaI       | <b>TGVVKY</b> DVK-----  | 69 |

**Fig S1** Structure-based multiple amino acid sequence alignment of selected methanol dehydrogenase (A) large and (B) small subunits. (A) Beta sheets found in the structures of the large subunits are placed in black boxes. The eight W-shaped  $\beta$  propellers (1-8) composed of four  $\beta$  strands each (A-D) that structure the proteins (1-4) are marked red with white lettering on top of the boxes. Conserved amino acids involved in the binding of PQQ and of  $\text{Ca}^{2+}$  are highlighted red and blue with white lettering, respectively. Asp301 found in the crystal structure of the XoxF-type MDH from *Methylacidiphilum fumariolicum* SolV (M.fumariol\_XoxF2) (5) to additionally coordinate the catalytic lanthanide ( $\text{La}^{3+}$ ,  $\text{Ce}^{3+}$ ) is marked dark green (white lettering); other amino acid substitutions (Thr259 and Gly171) related with the accommodation of the larger lanthanide ion are marked light green (black lettering). Asp299 (M.fumariol\_XoxF2 numbering), which is a catalytic key enzyme is marked blue (orange lettering). Other structural and catalytic key amino acids (1-4) are highlighted in various colors. S1-S3 and L4 represent variable sequences that confer enzyme specificity to PQQ-containing enzymes (4, 6). Amino acids that bind the small subunit (MxaI) in MxaFI-MDHs are boxed red. Predicted N-terminal leader sequences are printed in red; leader sequences have been omitted in the MxaF- and XoxF-type methanol dehydrogenases with known crystal structures. Proteins with known crystal structures are marked yellow in their coding names. M.oxyfera\_XoxF1 (DAMO\_0124) identified in this paper to constitute the large MDH subunit is marked light green. The peptide sequence used for the generation of polyclonal antibodies is marked yellow (black lettering). Protein names, bacterial species and protein accession numbers are the following (PDB codes in parentheses): M.extorquens\_MxaF, *Methylobacterium extorquens* AM1, YP\_001641590 (1H4I); M.trichosporium\_MxaF, *Methylosinus trichosporium* OB3b, EFH02986 (1G72); H.denitrificans\_MxaF, *Hyphomicrobium denitrificans* ATCC 51888, ADJ23135 (2D0V); P.denitrificans\_MxaF, *Paracoccus denitrificans* PD1222, ABL71076 (1LRW); M.oxyfera\_MxaF, DAMO\_0112; M.extorquens\_XoxF5, *Methylobacterium extorquens* PA1, ACS39584; M.radiotol\_XoxF5, *Methylobacterium radiotolerans* JCM 2831, ACB22519; B.MAFF\_XoxF5, *Bradyrhizobium diazoefficiens* USDA 110, NP\_772853; M.oxyfera\_XoxF2, DAMO\_0134; M.fumariol\_XoxF2, *M. fumariolicum* SolV, CCG91656 (4MAE); M.sylvestris\_XoxF1, *Methylocella sylvestris* BL2, ACK52058. The XoxF5 proteins included in the sequence alignment have an established function as methanol dehydrogenases and contain a REE (40-42). (B) Amino acid sequences of small subunits. N-terminal leader sequences (MAAQRIGLRISIGLSLLAAASSAVA) of M.oxyfera\_MxaI (DAMO\_0115) and of small units with known crystal structures have been omitted for clarity. Amino acids implicated in the binding of cyt  $c_L$  (7) are highlighted by red boxes. Other protein names and accession numbers of small subunits are as follows (PDB codes in parentheses): M.extorquens\_MxaF, *Methylobacterium extorquens* AM1 (1H4I); *H. denitrificans* ATCC 51888, ADJ23132 (2D0V); *Methylophilus*\_MxaI, *Methylophilus methylotrophus* W3A1/ *Methylosinus trichosporium* OB3b (1G72); *P. denitrificans* PD1222, ABL71079 (1LRW). Alignments were made by the ClustalW program. In (A) and (B), peptides identified in MDH from *M. oxyfera* by MALDI-TOF MS are underlined and printed in bold.

## SUPPLEMENTAL REFERENCES

1. **Anthony C, Ghosh M.** 1998. The structure and function of the PQQ-containing quinoprotein dehydrogenases. *Prog. Biophys. Mol. Biol.* **69**:1-21.
2. **Anthony C, Williams P.** 2003. The structure and mechanism of methanol dehydrogenase. *Biochim. Biophys. Acta* **1647**:18-23.
3. **Anthony C.** 2004. The quinoprotein dehydrogenases for methanol and glucose. *Arch. Biochem. Biophys.* **428**:2-9.
4. **Keltjens JT, Pol A, Reimann J, Op den Camp HJM.** 2014. PQQ-dependent methanol dehydrogenases: rare-earth elements make a difference. *Appl. Microbiol. Biotechnol.*, in press. DOI 10.1007/s00253-014-5766-8.
5. **Pol A, Barends TRM, Dietl A, Khadem AF, Eygensteyn J, Jetten MSM, Op den Camp HJM.** 2014. Rare earth metals are essential for methanotrophic life in volcanic mudpots. *Environ. Microbiol.* **16**:255-264.
6. **Toyama H, Mathews FS, Adachi O, Matsushita K.** 2004. Quinohemoprotein alcohol dehydrogenases: structure, function, and physiology. *Arch. Biochem. Biophys.* **428**:10-21.
7. **Nojiri M, Hira D, Yamaguchi K, Okajima T, Tanizawa K, Suzuki S.** 2006. Crystal structures of cytochrome  $c_L$  and methanol dehydrogenase from *Hyphomicrobium denitrificans*: structural and mechanistic insights into interactions between the two proteins. *Biochemistry* **45**:3481-3492.

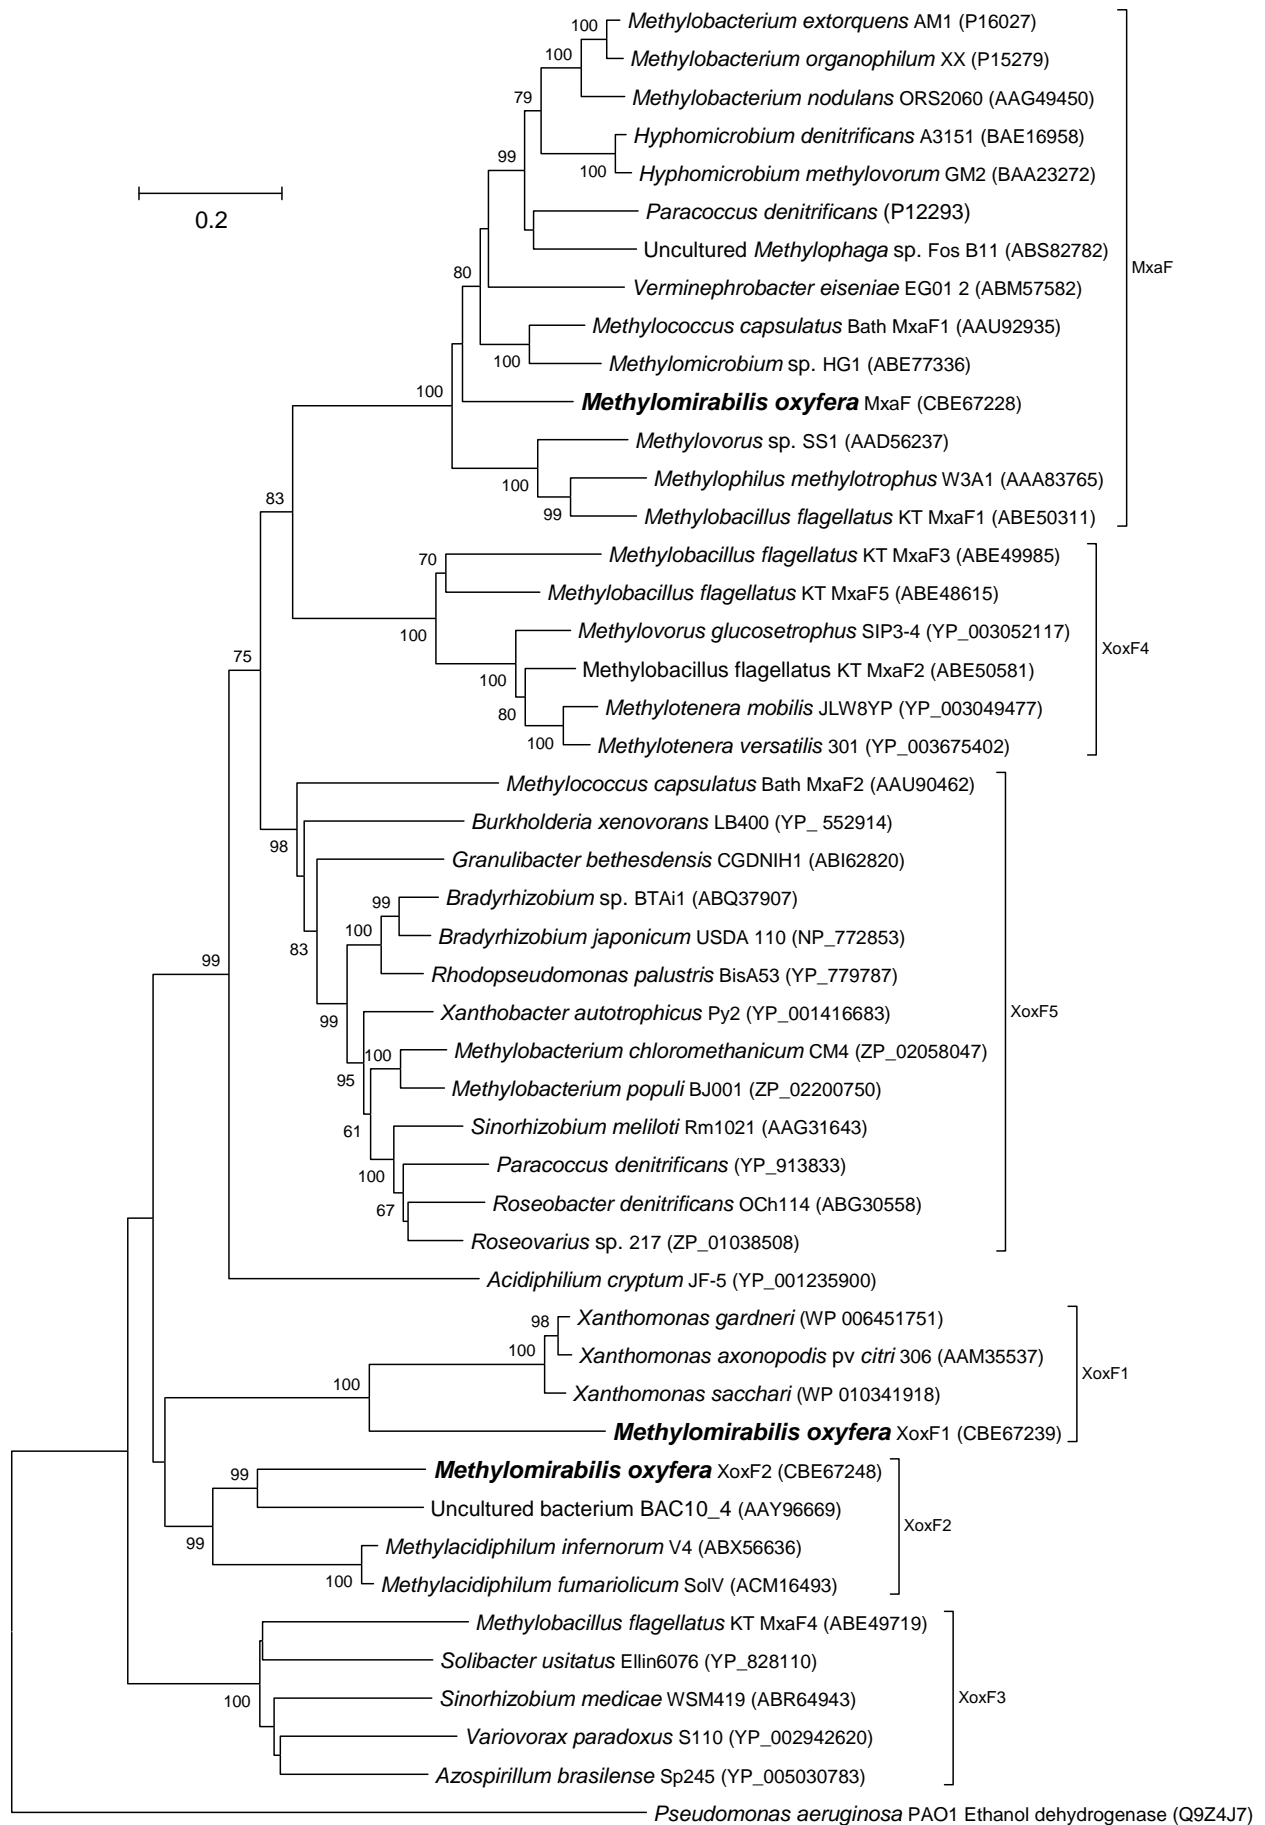

**Fig S2** Evolutionary relationships of MxaF and XoxF type methanol dehydrogenases. The evolutionary history was inferred using the Neighbor-Joining method (8). The optimal tree with the sum of branch length = 9.69298341 is shown. The percentage of replicate trees in which the associated taxa clustered together in the bootstrap test (500 replicates) are shown next to the branches (9). Values above 60 are shown. The tree is drawn to scale, with branch lengths in the same units as those of the evolutionary distances used to infer the phylogenetic tree. The evolutionary distances were computed using the Dayhoff matrix based method (10) and are in the units of the number of amino acid substitutions per site (scale bar). The analysis involved 48 amino acid sequences; protein accession numbers are mentioned in parentheses. All positions containing gaps and missing data were eliminated. There were a total of 526 positions in the final dataset. Evolutionary analyses were conducted in MEGA5 (11). The five clades of XoxF proteins along with MxaF proteins proposed by Chistoserdova (12) are bracketed at the right side of the figure. Note that our analysis suggests one more clade represented by an XoxF-type of MDH from *Acidiphilium cryptum* JF-5 (YP\_001235900).

#### SUPPLEMENTARY REFERENCES

8. **Saitou N, Nei M.** 1987. The neighbor-joining method: A new method for reconstructing phylogenetic trees. *Mol. Biol. Evol.* **4**:406-425.
9. **Felsenstein J.** 1985. Confidence limits on phylogenies: an approach using the bootstrap. *Evolution* **39**:783-791.
10. **Schwarz R, Dayhoff M.** 1979. Matrices for detecting distant relationships, p 353-358. *In* Dayhoff M (ed), Atlas of protein sequences. National Biomedical Research Foundation, Washington, Washington DC.
11. **Tamura K, Peterson D, Peterson N, Stecher G, Nei M, Kumar S.** 2011. MEGA5: Molecular Evolutionary Genetics Analysis using Maximum Likelihood, Evolutionary Distance, and Maximum Parsimony Methods. *Mol. Biol. Evo.* **28**:2731-2739.
12. **Chistoserdova L.** 2011. Modularity of methylotrophy, revisited. *Environ. Microbiol.* **13**:2603-2622.

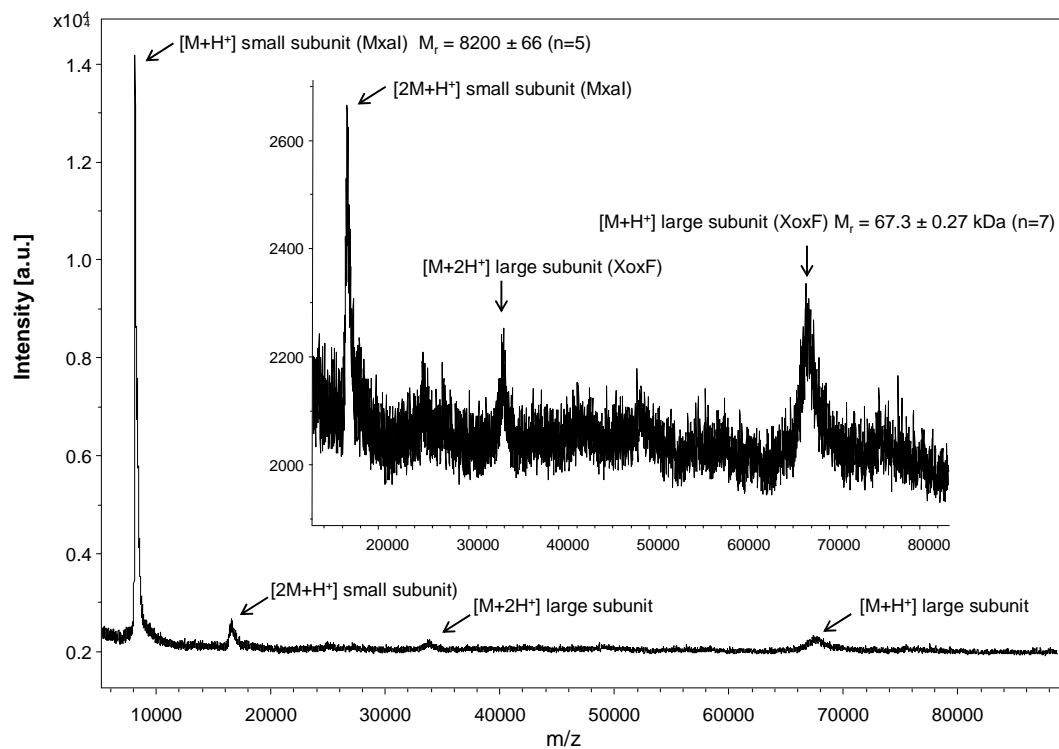

**FIG S3** Linear MALDI-TOF MS of methanol dehydrogenase from *M. oxyfera*. The analysis was performed on the as-isolated protein as described in Materials and Methods. Annotated peaks are indicated by arrows. The inset shows the 13000-8300  $m/z$  region in more detail.

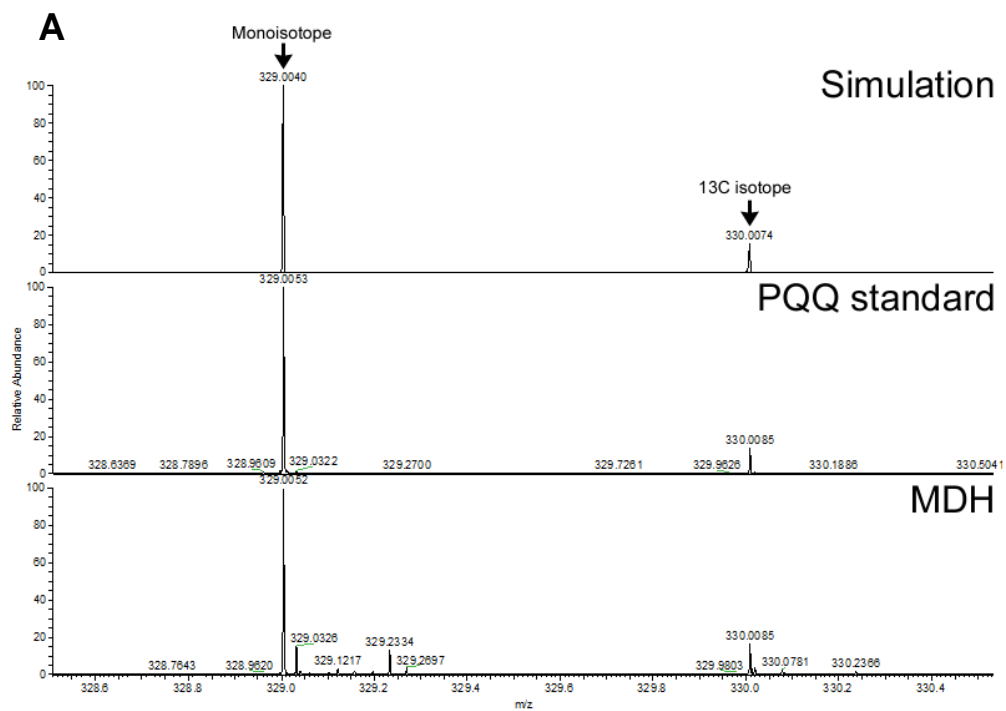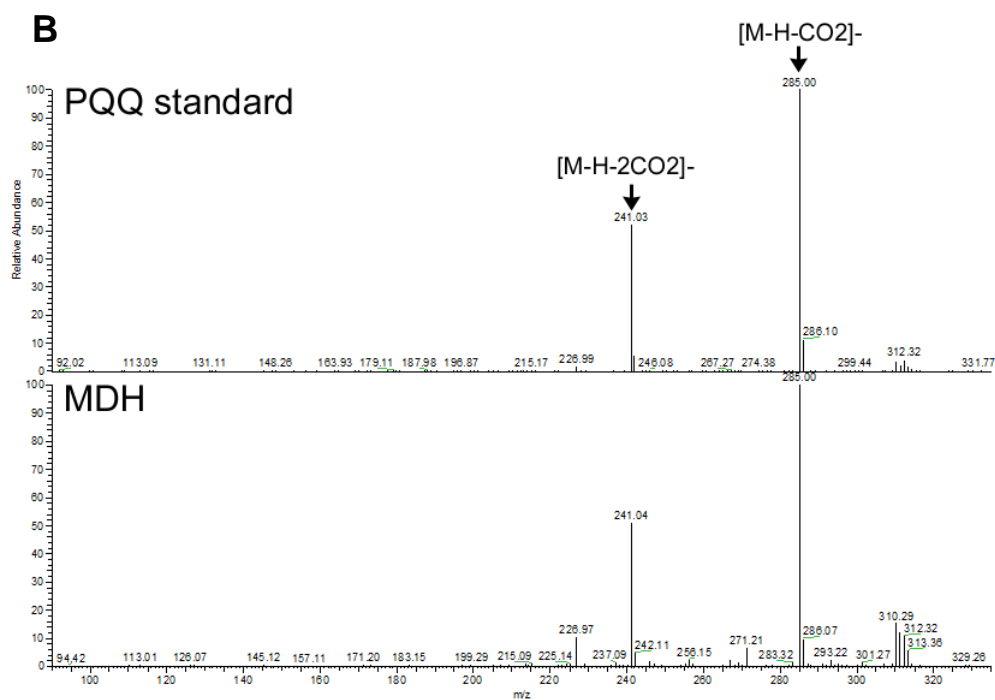

**FIG S4** Mass spectroscopic identification of PQQ in the purified methanol dehydrogenase. A, Simulated and acquired FT-ICR MS spectra of PQQ  $m/z$  329  $[\text{M}-\text{H}]^-$  precursor ion. B, linear ion trap CID fragmentation spectra of  $m/z$  329  $[\text{M}-\text{H}]^-$  for the PQQ standard and the enzyme preparation. Diagnostic fragmentation peaks are annotated in the Figure.
